# Supplementary material for: Altered affinity to ACE2 and reduced Fc functional antibodies to SARS-CoV-2 RBD variants
Source: bioRxiv or medRxiv preprint supplement (doi:10.1101/2022.07.07.22277364), 2022-07-10
Supplement: Supplementary file [file media-1.pdf]

**A**

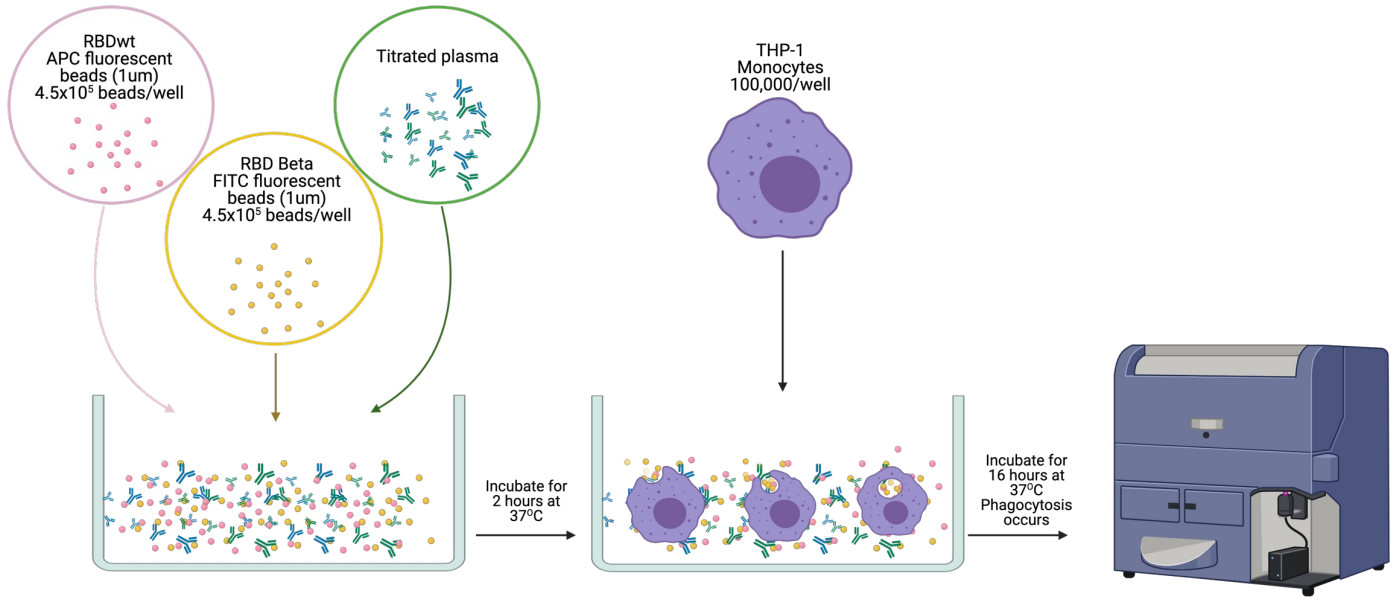

**B**

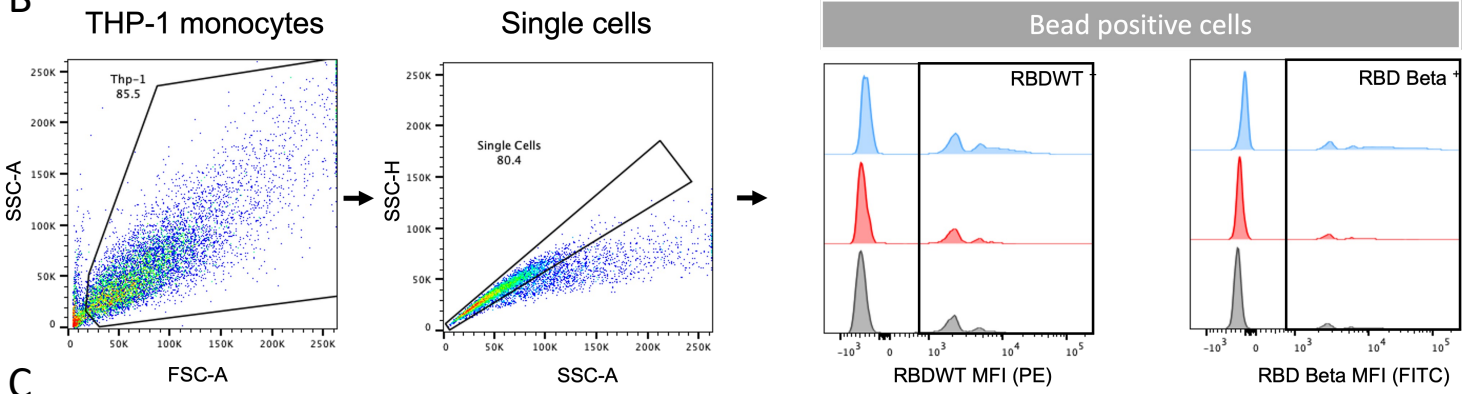

**C**

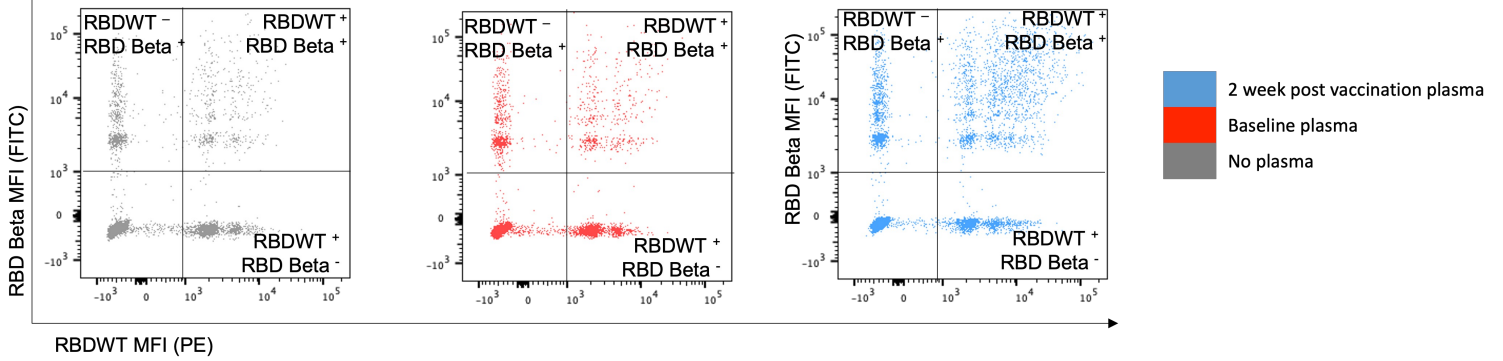

Supplementary Figure 1

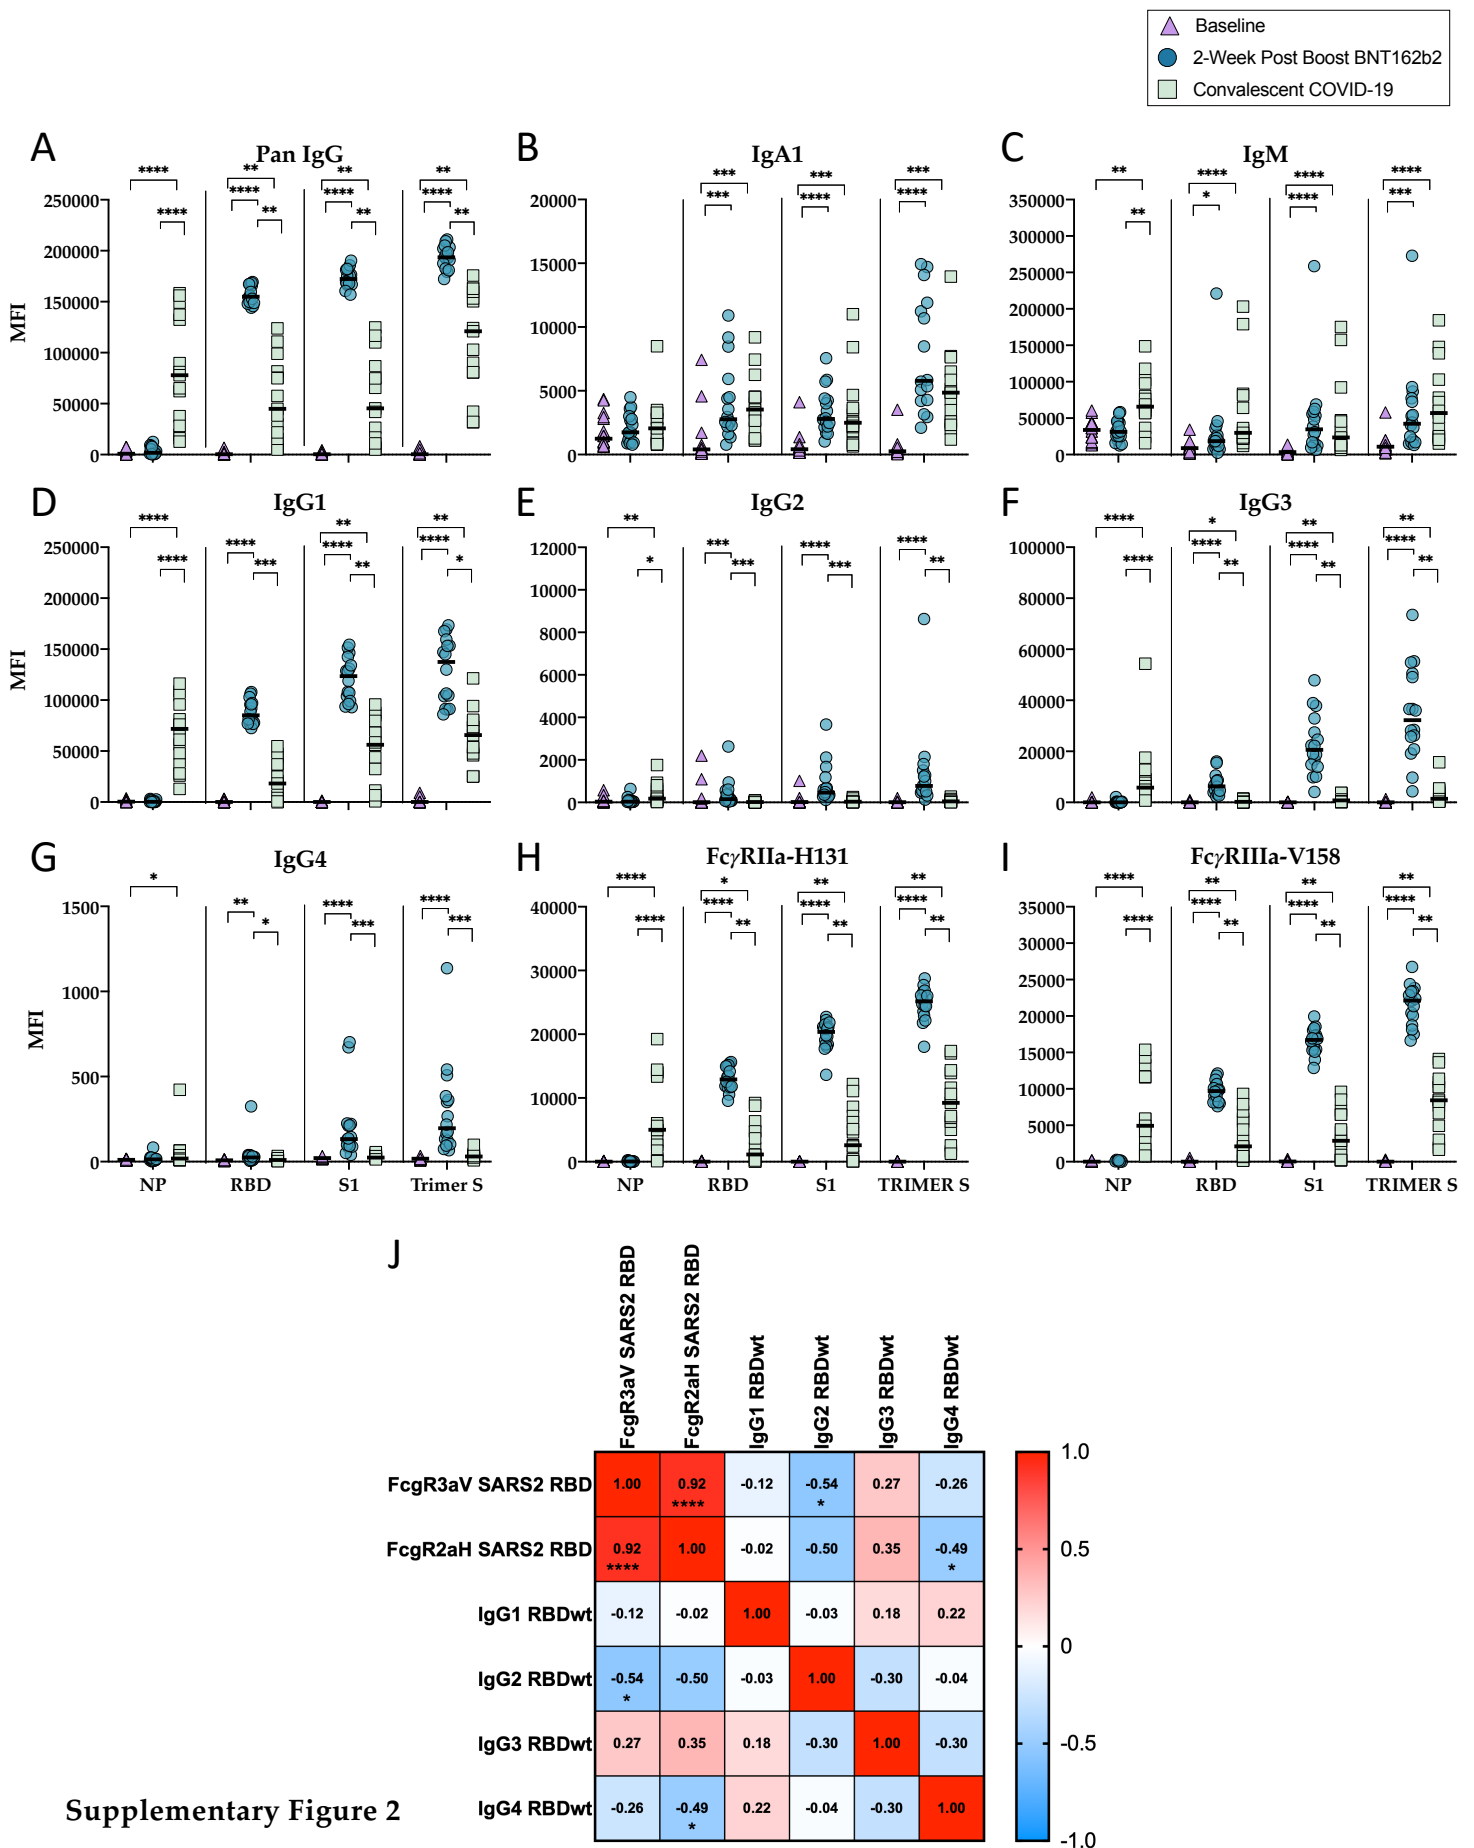

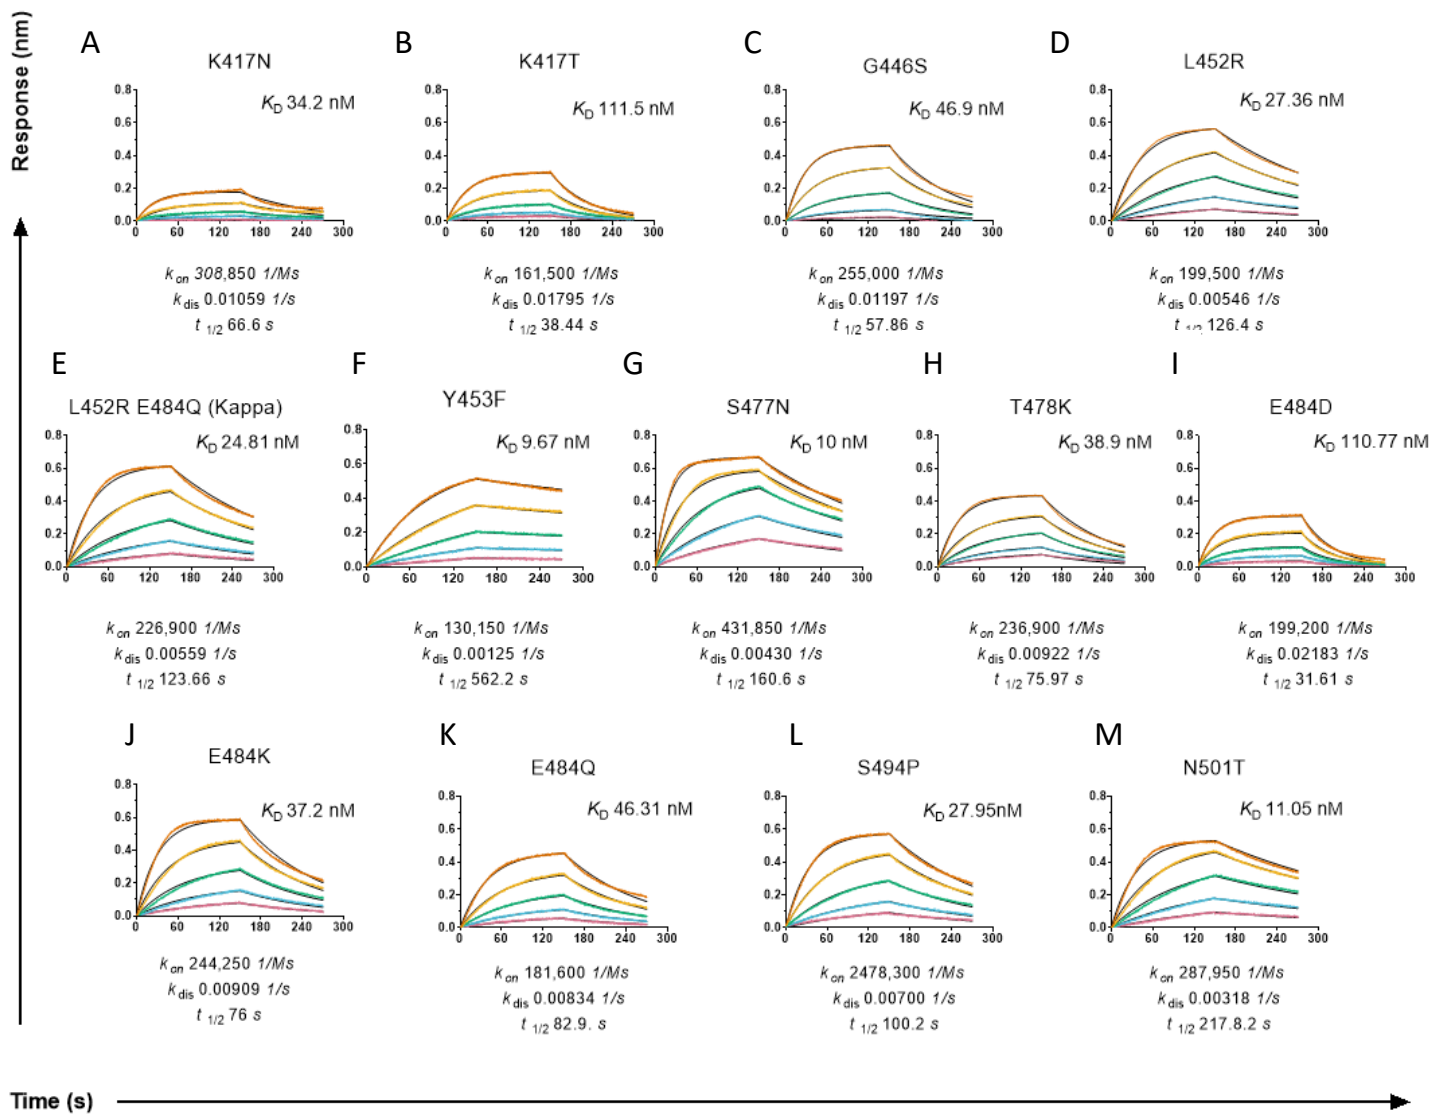

Supplementary Figure 3

**Supplementary Table 1**

| <b>Bead Supplier</b> | <b>Bead Region</b> | <b>Bead Catalogue Number</b> | <b>Antigen</b>                | <b>Protein Coupled/1x10<sup>7</sup> beads</b> |
|----------------------|--------------------|------------------------------|-------------------------------|-----------------------------------------------|
| Biorad               | 14                 | MC10014-01                   | Spike S1                      | 100ug                                         |
| Biorad               | 22                 | MC10022-01                   | Nucleoprotein                 | 40ug                                          |
| Biorad               | 76                 | MC10076-01                   | Spike Trimer                  | 100ug                                         |
| Biorad               | 74                 | MC10074-01                   | Influenza H1Cal2009 (control) | 100ug                                         |
| Biorad               | 15                 | MC10015-01                   | SIVgp120 (control)            | 100ug                                         |

**Supplementary Table 2**

| <b>Bead Supplier</b> | <b>Bead Region</b> | <b>Bead Catalogue Number</b> | <b>RBD Recombinant Protein</b>                              | <b>Protein Coupled/1x10<sup>7</sup> beads</b> |
|----------------------|--------------------|------------------------------|-------------------------------------------------------------|-----------------------------------------------|
| Biorad               | 6                  | MC12006-01                   | E406W                                                       | 100ug                                         |
| Biorad               | 7                  | MC10007-01                   | K417N                                                       | 100ug                                         |
| Biorad               | 9                  | MC10009-01                   | Ancestral wild-type (WT)                                    | 100ug                                         |
| Biorad               | 12                 | MC10012-01                   | Y453F                                                       | 100ug                                         |
| Biorad               | 13                 | MC10013-01                   | R403K                                                       | 100ug                                         |
| Biorad               | 15                 | MC10015-01                   | G446S                                                       | 100ug                                         |
| Biorad               | 16                 | MC12016-01                   | G446V                                                       | 100ug                                         |
| Biorad               | 18                 | MC10018-01                   | L455F                                                       | 100ug                                         |
| Biorad               | 20                 | MC10020-01                   | A475V                                                       | 100ug                                         |
| Biorad               | 22                 | MC10022-01                   | G476S                                                       | 100ug                                         |
| Biorad               | 25                 | MC10025-01                   | S477I                                                       | 100ug                                         |
| Biorad               | 26                 | MC10026-01                   | S477N                                                       | 100ug                                         |
| Biorad               | 29                 | MC10029-01                   | N439K                                                       | 100ug                                         |
| Biorad               | 30                 | MC10030-01                   | T478I                                                       | 100ug                                         |
| Biorad               | 33                 | MC10033-01                   | N501T                                                       | 100ug                                         |
| Biorad               | 34                 | MC10034-01                   | G485R                                                       | 100ug                                         |
| Biorad               | 35                 | MC10035-01                   | Q493K                                                       | 100ug                                         |
| Biorad               | 37                 | MC10037-01                   | S494L                                                       | 100ug                                         |
| Biorad               | 36                 | MC10036-01                   | V483A                                                       | 100ug                                         |
| Biorad               | 38                 | MC10038-01                   | E484A                                                       | 100ug                                         |
| Biorad               | 39                 | MC10039-01                   | E484D                                                       | 100ug                                         |
| Biorad               | 42                 | MC10042-01                   | E484K                                                       | 100ug                                         |
| Biorad               | 44                 | MC10044-01                   | F490S                                                       | 100ug                                         |
| Biorad               | 46                 | MC10045-01                   | N501S                                                       | 100ug                                         |
| Biorad               | 47                 | MC10047-01                   | S477R                                                       | 100ug                                         |
| Biorad               | 48                 | MC10048-01                   | Y505W                                                       | 100ug                                         |
| Biorad               | 50                 | MC12050-01                   | F486L                                                       | 100ug                                         |
| Biorad               | 51                 | MC10051-01                   | Q493L                                                       | 100ug                                         |
| Biorad               | 52                 | MC10052-01                   | S494P                                                       | 100ug                                         |
| Biorad               | 53                 | MC10053-01                   | N501Y                                                       | 100ug                                         |
| Biorad               | 55                 | MC10055-01                   | T478K                                                       | 100ug                                         |
| Biorad               | 61                 | MC10061-01                   | N501Y, E484K, K417N (B.1.251; Beta)                         | 100ug                                         |
| Biorad               | 62                 | MC10062-01                   | V503F                                                       | 100ug                                         |
| Biorad               | 64                 | MC10064-01                   | K417T                                                       | 100ug                                         |
| Biorad               | 70                 | MC10070-01                   | L452R                                                       | 100ug                                         |
| Biorad               | 72                 | MC10072-01                   | E484Q                                                       | 100ug                                         |
| Biorad               | 73                 | MC10073-01                   | N501Y, E484K, K417T (P1; Gamma)                             | 100ug                                         |
| Biorad               | 74                 | MC10074-01                   | S477N                                                       | 100ug                                         |
| Biorad               | 75                 | MC10075-01                   | Y489H                                                       | 100ug                                         |
| Biorad               | 76                 | MC10076-01                   | L452R E484Q (B.1.617.1; Kappa)                              | 100ug                                         |
| Biorad               | 77                 | MC10077-01                   | A520S                                                       | 100ug                                         |
| Biorad               | 78                 | MC10078-01                   | L452R, T478K (B.1.617.2; Delta)                             | 100ug                                         |
| Biorad               | 22                 | MC10078-22                   | Ancestral RBD (SinoBiological; Catalogue # 40592-V08H)      | 100ug                                         |
| Biorad               | 55                 | MC10078-55                   | Omicron RBD BA.2 (SinoBiological; Catalogue #40592-V08H123) | 100ug                                         |

**Supplementary Table 3**

| Dunn's multiple comparisons test | IgG Rank sum diff. | IgG Summary | IgG Adjusted P Value | ACE Rank sum diff. | ACE Summary | ACE Adjusted P Value | FcR2a Rank sum diff. | FcR2a Summary | FcR2a Adjusted P Value | FcR3a Rank sum diff. | FcR3a Summary | FcR3a Adjusted P Value |
|----------------------------------|--------------------|-------------|----------------------|--------------------|-------------|----------------------|----------------------|---------------|------------------------|----------------------|---------------|------------------------|
| Ancestral vs. Delta              | 156                | ns          | 0.4841               | 161.5              | ns          | 0.3774               | 197                  | ns            | 0.0639                 | 199                  | ns            | 0.0573                 |
| Ancestral vs. Kappa              | 315                | ****        | <0.0001              | 139.5              | ns          | 0.9799               | 359                  | ****          | <0.0001                | 290                  | ***           | 0.0001                 |
| Ancestral vs. Beta               | 510                | ****        | <0.0001              | 327.5              | ****        | <0.0001              | 536                  | ****          | <0.0001                | 465                  | ****          | <0.0001                |
| Ancestral vs. Gamma              | 546                | ****        | <0.0001              | 352.5              | ****        | <0.0001              | 550                  | ****          | <0.0001                | 464                  | ****          | <0.0001                |
| Ancestral vs. K417T              | -38                | ns          | >0.9999              | -172.5             | ns          | 0.2246               | 3                    | ns            | >0.9999                | 18.5                 | ns            | >0.9999                |
| Ancestral vs. Y505W              | -23                | ns          | >0.9999              | 272.5              | ***         | 0.0005               | 80                   | ns            | >0.9999                | 0                    | ns            | >0.9999                |
| Ancestral vs. F486L              | 19                 | ns          | >0.9999              | -204.5             | *           | 0.0423               | 33                   | ns            | >0.9999                | -92                  | ns            | >0.9999                |
| Ancestral vs. E484A              | 21                 | ns          | >0.9999              | 101                | ns          | >0.9999              | 64                   | ns            | >0.9999                | 31                   | ns            | >0.9999                |
| Ancestral vs. S494P              | 65.5               | ns          | >0.9999              | 139.5              | ns          | 0.9799               | 52                   | ns            | >0.9999                | 31                   | ns            | >0.9999                |
| Ancestral vs. Q493K              | 43                 | ns          | >0.9999              | -146.5             | ns          | 0.7321               | 52                   | ns            | >0.9999                | 182.5                | ns            | 0.1367                 |
| Ancestral vs. L452R              | 47.5               | ns          | >0.9999              | 204.5              | *           | 0.0423               | 34                   | ns            | >0.9999                | -6                   | ns            | >0.9999                |
| Ancestral vs. T478K              | 78                 | ns          | >0.9999              | -121.5             | ns          | >0.9999              | 105                  | ns            | >0.9999                | 52                   | ns            | >0.9999                |
| Ancestral vs. E484Q              | 120                | ns          | >0.9999              | -5.5               | ns          | >0.9999              | 135                  | ns            | >0.9999                | 59                   | ns            | >0.9999                |
| Ancestral vs. T478I              | 140                | ns          | 0.9601               | -51.5              | ns          | >0.9999              | 137                  | ns            | >0.9999                | -12                  | ns            | >0.9999                |
| Ancestral vs. N501Y              | 107                | ns          | >0.9999              | 359.5              | ****        | <0.0001              | 118                  | ns            | >0.9999                | 28                   | ns            | >0.9999                |
| Ancestral vs. N403K              | 152                | ns          | 0.5776               | 54.5               | ns          | >0.9999              | 199                  | ns            | 0.0573                 | -16                  | ns            | >0.9999                |
| Ancestral vs. L455F              | 173                | ns          | 0.2192               | -39                | ns          | >0.9999              | 145                  | ns            | 0.78                   | 30                   | ns            | >0.9999                |
| Ancestral vs. V483A              | 221                | *           | 0.0162               | -29.5              | ns          | >0.9999              | 210.5                | *             | 0.0301                 | 131                  | ns            | >0.9999                |
| Ancestral vs. N501S              | 224                | *           | 0.0136               | -179               | ns          | 0.1631               | 224.5                | *             | 0.0132                 | 223                  | *             | 0.0144                 |
| Ancestral vs. N439K              | 232.5              | **          | 0.008                | 204                | *           | 0.0434               | 236                  | **            | 0.0064                 | 28                   | ns            | >0.9999                |
| Ancestral vs. G476S              | 246                | **          | 0.0034               | 14                 | ns          | >0.9999              | 258                  | **            | 0.0015                 | 106.5                | ns            | >0.9999                |
| Ancestral vs. Y489H              | 276                | ***         | 0.0004               | -36.5              | ns          | >0.9999              | 305                  | ****          | <0.0001                | 324                  | ****          | <0.0001                |
| Ancestral vs. Y453F              | 284                | ***         | 0.0002               | 282.5              | ***         | 0.0003               | 397                  | ****          | <0.0001                | 385                  | ****          | <0.0001                |
| Ancestral vs. K417N              | 256                | **          | 0.0017               | -107.5             | ns          | >0.9999              | 357                  | ****          | <0.0001                | 336                  | ****          | <0.0001                |
| Ancestral vs. A475V              | 311                | ****        | <0.0001              | 14.5               | ns          | >0.9999              | 350                  | ****          | <0.0001                | 211                  | *             | 0.0292                 |
| Ancestral vs. A520S              | 354                | ****        | <0.0001              | -133.5             | ns          | >0.9999              | 421                  | ****          | <0.0001                | 381                  | ****          | <0.0001                |
| Ancestral vs. V503F              | 367                | ****        | <0.0001              | 6.5                | ns          | >0.9999              | 404                  | ****          | <0.0001                | 177                  | ns            | 0.1802                 |
| Ancestral vs. Q493L              | 360                | ****        | <0.0001              | 301.5              | ****        | <0.0001              | 404                  | ****          | <0.0001                | 247                  | **            | 0.0032                 |
| Ancestral vs. S477N              | 394                | ****        | <0.0001              | 147                | ns          | 0.7167               | 230                  | **            | 0.0094                 | 51                   | ns            | >0.9999                |
| Ancestral vs. E484D              | 428                | ****        | <0.0001              | 212.5              | *           | 0.0268               | 339                  | ****          | <0.0001                | 242.5                | **            | 0.0042                 |
| Ancestral vs. S477R              | 408.5              | ****        | <0.0001              | 7.5                | ns          | >0.9999              | 516                  | ****          | <0.0001                | 450                  | ****          | <0.0001                |
| Ancestral vs. S477I              | 428.5              | ****        | <0.0001              | -91                | ns          | >0.9999              | 492                  | ****          | <0.0001                | 415                  | ****          | <0.0001                |
| Ancestral vs. G446V              | 439.5              | ****        | <0.0001              | 131.5              | ns          | >0.9999              | 344                  | ****          | <0.0001                | 282                  | ***           | 0.0003                 |
| Ancestral vs. G446S              | 465                | ****        | <0.0001              | 187.5              | ns          | 0.1058               | 440                  | ****          | <0.0001                | 305                  | ****          | <0.0001                |
| Ancestral vs. E484K              | 490                | ****        | <0.0001              | 119.5              | ns          | >0.9999              | 467                  | ****          | <0.0001                | 365                  | ****          | <0.0001                |
| Ancestral vs. F490S              | 502                | ****        | <0.0001              | -42.5              | ns          | >0.9999              | 483                  | ****          | <0.0001                | 351                  | ****          | <0.0001                |
| Ancestral vs. N501T              | 495                | ****        | <0.0001              | 260.5              | **          | 0.0013               | 507                  | ****          | <0.0001                | 447                  | ****          | <0.0001                |

Supplementary Table 4.

| <b>RBD</b>                 | <b><math>K_D</math> (nM)</b> | <b>SD</b> | <b><math>k_{on}</math> (<math>\mu\text{M}^{-1}\text{s}^{-1}</math>)</b> | <b>SD</b> | <b><math>k_{off}</math> (<math>\text{s}^{-1}</math>)</b> | <b>SD</b> |
|----------------------------|------------------------------|-----------|-------------------------------------------------------------------------|-----------|----------------------------------------------------------|-----------|
| <b>Ancestral</b>           | 29.4                         | 2.62      | 0.28                                                                    | 0.019     | 0.00825                                                  | 0.00016   |
| <b>Alpha (N501Y)</b>       | 6.4                          | 0.49      | 0.33                                                                    | 0.003     | 0.0021                                                   | 0.00018   |
| <b>Beta</b>                | 14.6                         | 2.28      | 0.29                                                                    | 0.013     | 0.00427                                                  | 0.00086   |
| <b>Delta</b>               | 21.5                         | 0.63      | 0.22                                                                    | 0.006     | 0.00480                                                  | 0.00001   |
| <b>Gamma</b>               | 15.0                         | 1.64      | 0.22                                                                    | 0.011     | 0.00325                                                  | 0.00052   |
| <b>Omicron BA2</b>         | 11.0                         | 0.03      | 0.39                                                                    | 0.02      | 0.00427                                                  | 0.00019   |
| <b>K417N</b>               | 34.20                        | 5.80      | 0.31                                                                    | 0.013     | 0.01059                                                  | 0.00226   |
| <b>K417T</b>               | 111.50                       | 12.02     | 0.16                                                                    | 0.011     | 0.01795                                                  | 0.00078   |
| <b>G446S</b>               | 46.9                         | 3.18      | 0.26                                                                    | 0.003     | 0.01197                                                  | 0.00097   |
| <b>L452R</b>               | 27.36                        | 0.08      | 0.20                                                                    | 0.004     | 0.00546                                                  | 0.00010   |
| <b>L452R E484Q (Kappa)</b> | 24.81                        | 3.77      | 0.23                                                                    | 0.019     | 0.00559                                                  | 0.00039   |
| <b>Y453F</b>               | 9.67                         | 0.42      | 0.13                                                                    | 0.031     | 0.00125                                                  | 0.00024   |
| <b>S477N</b>               | 10.0                         | 0.18      | 0.43                                                                    | 0.034     | 0.0043                                                   | 0.00026   |
| <b>T478K</b>               | 38.9                         | 6.33      | 0.24                                                                    | 0.002     | 0.00922                                                  | 0.00160   |
| <b>E484D</b>               | 110.77                       | 16.88     | 0.2                                                                     | 0.0281    | 0.02183                                                  | 0.00024   |
| <b>E484K</b>               | 37.2                         | 1.56      | 0.24                                                                    | 0.001     | 0.00909                                                  | 0.00033   |
| <b>E484Q</b>               | 46.31                        | 7.62      | 0.18                                                                    | 0.020     | 0.00834                                                  | 0.0005    |
| <b>S494P</b>               | 27.95                        | 2.62      | 0.25                                                                    | 0.029     | 0.00689                                                  | 0.00016   |
| <b>N501T</b>               | 11.1                         | 1.10      | 0.29                                                                    | 0.01      | 0.00318                                                  | 0.00023   |

$K_D$  = dissociation constant,  $k_{on}$  = association rate constant,  $k_{off}$  = dissociation rate constant  
 Measured via BLI, calculated from 2 independent experiments

**Supplementary Table 5.**

| RBD           | hACE-2 variant | Conc. (nM) | K <sub>D</sub> (nM) | SD   | Ratio to WT ACE2 | k <sub>on</sub> (μM <sup>-1</sup> s <sup>-1</sup> ) | SD    | k <sub>off</sub> (s <sup>-1</sup> ) | SD      |
|---------------|----------------|------------|---------------------|------|------------------|-----------------------------------------------------|-------|-------------------------------------|---------|
| Ancestral     | WT             | 100        | 29.40               | 2.6  |                  | 0.2800                                              | 0.019 | 0.0083                              | 0.00016 |
|               | E35K           | 100        | 36.63               | 3.6  | 0.80             | 0.3013                                              | 0.007 | 0.0110                              | 0.00085 |
|               | K26R           | 100        | 20.00               | 3.4  | 1.47             | 0.3074                                              | 0.025 | 0.0061                              | 0.00054 |
|               | S19P           | 100        | 14.38               | 1.2  | 2.04             | 0.2844                                              | 0.002 | 0.0041                              | 0.00038 |
| Alpha (N501Y) | WT             | 100        | 6.4                 | 0.49 |                  | 0.3300                                              | 0.003 | 0.0021                              | 0.00018 |
|               | E35K           | 100        | 9.23                | 3.71 | 0.69             | 0.3002                                              | 0.014 | 0.0027                              | 0.00098 |
|               | K26R           | 100        | 4.97                | 1.81 | 1.29             | 0.3404                                              | 0.013 | 0.0017                              | 0.00055 |
|               | S19P           | 100        | 2.93                | 0.90 | 2.19             | 0.3322                                              | 0.008 | 0.0010                              | 0.00032 |
| Beta          | WT             | 100        | 14.60               | 2.3  |                  | 0.2900                                              | 0.013 | 0.0043                              | 0.00086 |
|               | E35K           | 100        | 72.52               | 29.6 | 0.20             | 0.2832                                              | 0.017 | 0.0203                              | 0.00713 |
|               | K26R           | 100        | 17.49               | 7.9  | 0.84             | 0.3256                                              | 0.093 | 0.0053                              | 0.00093 |
|               | S19P           | 100        | 10.51               | 0.9  | 1.39             | 0.2627                                              | 0.026 | 0.0028                              | 0.00005 |
| Delta         | WT             | 100        | 21.50               | 0.6  |                  | 0.2200                                              | 0.006 | 0.0048                              | 0.00001 |
|               | E35K           | 100        | 43.34               | 12.1 | 0.50             | 0.3062                                              | 0.049 | 0.0130                              | 0.00156 |
|               | K26R           | 100        | 13.47               | 2.5  | 1.60             | 0.3295                                              | 0.042 | 0.0044                              | 0.00025 |
|               | S19P           | 100        | 8.56                | 1.4  | 2.51             | 0.3215                                              | 0.026 | 0.0027                              | 0.00022 |
| Omicron BA.2  | WT             | 100        | 11.00               | 0.0  |                  | 0.3900                                              | 0.020 | 0.0043                              | 0.00019 |
|               | E35K           | 100        | 18.50               | 5.8  | 0.59             | 0.2817                                              | 0.018 | 0.0052                              | 0.00131 |
|               | K26R           | 100        | 5.18                | 1.6  | 2.12             | 0.6210                                              | 0.075 | 0.0033                              | 0.00139 |
|               | S19P           | 100        | 4.97                | 1.2  | 2.21             | 0.5631                                              | 0.077 | 0.0028                              | 0.00106 |

Measured via BLI, calculated from 2 independent experiments



Supplementary Table 6

| Population                      | Ashkenazi Jewish | European (non-Finnish) | Other     | Latino/Admixed American | South Asian | African/African American | European (Finnish) | East Asian |
|---------------------------------|------------------|------------------------|-----------|-------------------------|-------------|--------------------------|--------------------|------------|
| <i>K26R</i><br>Allele Frequency | 0.01188          | 0.005868               | 0.003378  | 0.003249                | 0.001313    | 0.000946                 | 0.000483           | 0.000067   |
| <i>S19P</i><br>Allele Frequency | 0                | 0                      | 0.0001882 | 0                       | 0           | 0.003323                 | 0                  | 0          |
| <i>E35K</i><br>Allele Frequency | 0                | 0.000012               | 0         | 0                       | 0           | 0                        | 0                  | 0.000144   |

Polymorphism data collated from Genome Aggregation Database (gnomAD v2.1.1; <https://gnomad.broadinstitute.org>)
